# Supplementary material
Source: publisher figshare collection journal article supplement (https://gsapubs.figshare.com/ndownloader/files/23294456)
Supplement: Supplementary file 1 [file 23294456]

GSA Data Repository item #2012306

From: Lee, Tsan-Kuang, and Guertin, L., 2012, Building an education game with the Google Earth application programming interface to enhance geographic literacy, *in* Whitmeyer, S.J., Bailey, J.E., De Paor, D.G., and Ornduff, T., eds., Google Earth and Virtual Visualizations in Geoscience Education and Research: Geological Society of America Special Paper 492, p. 395–401, doi:10.1130/2012.2492(29).

APPENDIX

All the working code is available for download from the URL provided above in the Demonstration section.

The stand-alone version of the game needs all of the following files:

- index.html: the main html page.
- geowhiz.css: the styles and the layout of the game.
- jquery.min.js, json2.min.js, lzw.js: common libraries for control, data structure, and compression.
- geowhiz.js: game flow control functions.
- recordView2.js: the functions to record and playback player movements.

To install the game on the server, download the zip file, unpack it into a directory, and open index.html with a browser.

Two highly customized files are attached below, with comments in the code to explain the implementation.

Game main page source (index.html) (Downloadable from the URL provided in the section Demonstration).

<!DOCTYPE html PUBLIC "-//W3C//DTD XHTML 1.0 Transitional//EN""http://www.w3.org/TR/xhtml1/DTD/xhtml1-transitional.dtd">

<html>

<head>

<!--

This version of Google Earth Amazing Race is a standalone, i.e. it does not communicate with a server to save your score and compare that to others.

However, the code communicating to the server is still preserved here, only commented out, for those who plan to host a server.

-->

<meta http-equiv="content-type" content="text/html; charset=utf-8" />

<title>Penn State's Amazing Race!</title>

<link rel=stylesheet href='styles/geowhiz.css' type='text/css' />

<!-- Note that the following API key is domain specific so if you are hosting the code yourself, you will need to get a free key from Google Earth. -->

<script src="http://www.google.com/jsapi?key=ABQIAAAAzROofMkTv78nBLN725kfeRQRkJNIoKg2YI5RxnRAujz7qYGgehTXBKktI5K8NwV30paskZR2wFYnHQ"></script>

<!-- jquery is a common standard javascript library that is freely available -->

<script type="text/javascript" src="http://ajax.googleapis.com/ajax/libs/jquery/1.4.2/jquery.min.js"></script>

<!-- recordView2.js is our utility to record/replay user movement within Google Earth -->

<script type="text/javascript" src="javascript/recordView2.js"></script>

<!-- json is also a common standard javascript library -->

<script type="text/javascript" src="javascript/json2.min.js"></script>

<!-- lzw is a compression utility used to compress the data stream to save the bandwidth when communicating with the game server -->

<script type="text/javascript" src="javascript/lzw.js"></script>

<!-- Geowhiz is the original Google Earth Demo game we based ours on -->

<script type="text/javascript" src="javascript/geowhiz.js"></script>

<script type="text/javascript">

google.load("earth", "1");

google.load("maps", "2");

var messageArea;

var correctSound;

var correctAudio;

var reportURL;

var recordingURL;

var currentlyUploading = false;

var gameBaseURL = location.href.match(/^.*\//);

//---------------------------------------------------------------------------

// GOOGLE EARTH PLUGIN RELATED CODE

//---------------------------------------------------------------------------

var ge = null;

var gex = null;

var geocoder;

// initialize user interface layout, sound engine, and Google Earth plugin

function init() {

messageArea = document.getElementById( 'messageArea' );

if( ( navigator.appName == "Netscape" ) || ( navigator.appName == "Chrome" ) )

correctAudio = document.getElementById( "correctAudio" );

else

correctSound = document.getElementById( "correctSound" );

geocoder = new GClientGeocoder();

init3D();

}

window.onbeforeunload = confirmExit;

function confirmExit()

{

if( currentlyUploading )

{

return "Please wait until your results have been uploaded.";

}

}

function initCB(object) {

ge = object;

ge.getWindow().setVisibility(true);

ge.getNavigationControl().setVisibility(ge.VISIBILITY_SHOW);

//ge.getLayerRoot().enableLayerById(ge.LAYER_BORDERS, true);

var href = gameBaseURL + 'boundaries.kmz';

google.earth.fetchKml(ge, href, kmlFinishedLoading);

// turn on the eventListeners

recordView.setEventListeners(1);

displayPsuLogo();

// App is ready to go! Initial

initGeoWhiz();

}

function displayPsuLogo() {

// Create the ScreenOverlay

var screenOverlay = ge.createScreenOverlay('');

// Specify a path to the image and set as the icon

var icon = ge.createIcon('');

icon.setHref(gameBaseURL + 'images/psu_logo_ets.png');

screenOverlay.setIcon(icon);

// Set the ScreenOverlay's position in the window

screenOverlay.getOverlayXY().setXUnits(ge.UNITS_PIXELS);

screenOverlay.getOverlayXY().setYUnits(ge.UNITS_PIXELS);

screenOverlay.getOverlayXY().setX(48);

screenOverlay.getOverlayXY().setY(32);

//// Set the overlay's size in pixels

screenOverlay.getSize().setXUnits(ge.UNITS_PIXELS);

screenOverlay.getSize().setYUnits(ge.UNITS_PIXELS);

screenOverlay.getSize().setX(96);

screenOverlay.getSize().setY(64);

// Add the ScreenOverlay to Earth

ge.getFeatures().appendChild(screenOverlay);

}

// once the boundaries information in the KML is loaded, link them to the map

function kmlFinishedLoading(obj) {

kmlObject = obj;

if (kmlObject) {

ge.getFeatures().appendChild(kmlObject);

if (kmlObject.getAbstractView())

ge.getView().setAbstractView(kmlObject.getAbstractView());

// set opacity for states

ge.getFeatures().getLastChild().getFeatures().getFirstChild().setOpacity(1.0);

}

}

function showHideKml() {

kmlObject.setVisibility(!kmlObject.getVisibility());

}

function failureCB(object) {

/***

* This function will be called if plugin fails to load, in case

* you need to handle that error condition.

***/

}

function init3D() {

google.earth.createInstance("map3d", initCB, failureCB);

}

function unescapeXml(xml) {

return xml.

replace(/&lt;/g, '<').

replace(/&gt;/g, '>').

replace(/&apos;/g, "'").

replace(/&quot;/g, '"').

replace(/&amp;/g, '&');

}

//===========================================================================

// AMAZING RACE / GeoWhiz RELATED GUI CODE

//===========================================================================

// Global variables

var defaultTimeGiven = 3*60*1000;

function StringIntPair(str, intval) {

if (null == intval)

{

intval = defaultTimeGiven; // default to 3 minutes (unit = ms)

}

this.str = str;

this.intval = intval;

}

// The Questions

var geographyList = new Array();

geographyList.push(new StringIntPair("New York, New York, USA"));

geographyList.push(new StringIntPair("Yellowstone National Park, USA"));

geographyList.push(new StringIntPair("Iraq"));

geographyList.push(new StringIntPair("Arizona, USA"));

geographyList.push(new StringIntPair("Egypt"));

geographyList.push(new StringIntPair("Iceland"));

geographyList.push(new StringIntPair("Athens, Greece"));

geographyList.push(new StringIntPair("Melbourne, Victoria, Australia"));

geographyList.push(new StringIntPair("Yosemite National Park, USA"));

geographyList.push(new StringIntPair("Louisiana, USA"));

geographyList.push(new StringIntPair("Costa Rica"));

geographyList.push(new StringIntPair("Phillipines"));

geographyList.push(new StringIntPair("Glacier National Park, USA"));

geographyList.push(new StringIntPair("Afghanistan"));

geographyList.push(new StringIntPair("Centralia, PA, USA"));

// Score and index

var currentIndex = 0;

var score = 0;

function initGeoWhiz() {

// Set the initial view

//var la = ge.createLookAt('');

//la.set(0, 0, 40000000, ge.ALTITUDE_RELATIVE_TO_GROUND, 0, 0, 99.99);

//ge.getView().setAbstractView(la);

window.createReticle();

alert("Rules:\n\nMove the earth such that the aiming box is on top of the geographic location requested. You should have plenty of time for each question. Remember to zoom in to your location -- having a big box covering a large area does not count.");

messageArea.style.background = 'url(images/loopingFlash.gif)';

// Start the game

lookForNewLocation();

}

// The place was found on time, go to the next location

window.onFound = function() {

score++;

lookForNewLocation(true);

}

// Not found on time. Move on.

window.onTimeExpired = function() {

lookForNewLocation(false);

}

// Check gui updates

window.onUpdateCallback = function(timeLeft) {

if (timeLeft >= 0)

document.getElementById('time').innerHTML = timeLeft;

}

// Helper function to concatenate score / total question

function getScoreAsString() {

return score + "/" + currentIndex;

}

// Updates the right column showing a + for a point and a - for a miss

function updateResults(found) {

var contents = document.getElementById('results').innerHTML;

var check = found ? "+" : "-";

var style = found ? "correct" : "wrong";

var newline = '<div class="resultLine"><span class="' + style + '">[' + check + '] ' +

geographyList[currentIndex-1].str + '</span>';

var newResultHTML = contents + newline;

if (found)

{

var timeLeft = document.getElementById('time').innerHTML;

var timeSpent = (defaultTimeGiven-timeLeft)/1000.0;

newResultHTML += ' (' + timeSpent + ' sec)';

}

document.getElementById('results').innerHTML = newResultHTML + '</div>\n';

}

// Helper for getting a variation of messages

function getRandInt(max) {

var rand = Math.random();

return Math.floor(rand * max) % max;

}

var positiveMessageList = [

"Good job!",

"Yes!",

"Keep it up!",

"You found it!"];

function getNegativeMsg() {

return negativeMessageList[getRandInt(negativeMessageList.length)];

}

var negativeMessageList = [

"Time's up. Life is short. Let's move on.",

"Too hard? Let's try the next one."

];

function getPositiveMsg() {

return positiveMessageList[getRandInt(positiveMessageList.length)];

}

// Traverses the list the list of questions

function lookForNewLocation(found) {

// mini-hack around alert/mouse event issue

ge.getOptions().setMouseNavigationEnabled(false);

ge.getOptions().setMouseNavigationEnabled(true);

// Are there any questions left?

//if( currentIndex >= geographyList.length )

// messageArea.innerHTML = "<center><h3>Please wait while your results are recorded...</h3></center>";

if (currentIndex < geographyList.length) {

// Update the score and move onto the next question.

if (currentIndex != 0) {

updateResults(found);

document.getElementById('score').innerHTML = getScoreAsString();

if (!found) {

messageArea.innerHTML = "<center><h3>" + getNegativeMsg() + " Now find: " + geographyList[currentIndex].str + "</h3></center>";

if( ( navigator.appName == "Netscape" ) || ( navigator.appName == "Chrome" ) )

correctAudio.play();

else

correctSound.Play();

} else

messageArea.innerHTML = "<center><h3>" + getPositiveMsg() + " Now find: " + geographyList[currentIndex].str + "</h3></center>";

if( ( navigator.appName == "Netscape" ) || ( navigator.appName == "Chrome" ) )

correctAudio.play();

else

correctSound.Play();

} else {

messageArea.innerHTML = "<center><h3>First, find: " + geographyList[currentIndex].str + "</h3></center>";

if( ( navigator.appName == "Netscape" ) || ( navigator.appName == "Chrome" ) )

correctAudio.play();

else

correctSound.Play();

}

window.find(geographyList[currentIndex].str,

geographyList[currentIndex].intval);

document.getElementById('find').innerHTML =

geographyList[currentIndex].str;

document.getElementById('findProgress').innerHTML =

(currentIndex+1) + ' of ' + geographyList.length;

currentIndex++;

} else {

// Game over.

if( ( navigator.appName == "Netscape" ) || ( navigator.appName == "Chrome" ) )

correctAudio.play();

else

correctSound.Play();

messageArea.innerHTML = "<center><h3>Game over.</h3></center>";

var done = 0;

//Give the user some nice words of encouragement :).

updateResults(found);

setTimeout( "uploadResults()", 100 );

}

}

function uploadResults()

{

if( ( navigator.appName == "Netscape" ) || ( navigator.appName == "Chrome" ) )

correctAudio.play();

else

correctSound.Play();

// turn off listeners

recordView.setEventListeners(0);

//// send back info first

//var linkURL = document.getElementById( 'linkURL' ).value;

//var userID = document.getElementById( 'userID' ).value;

//var attempt = document.getElementById( 'attempt' ).value;

//reportURL = linkURL + "?task=storeResults&userID=" + userID + "&attempt=" + attempt;

//recordingURL = linkURL + "?task=storeRecording&userID=" + userID + "&attempt=" + attempt;

//var exitURL = document.getElementById( 'exitURL' ).value;

//currentlyUploading = true;

//$.post(

// reportURL,

// {

// results: $( '#results' ).html()

// },

// function( data ) {

// $.post(

// recordingURL,

// {

// recording: recordView.stringifyViewRecordArray()

// },

// function( data ) {

messageArea.style.background = 'url(images/white.gif)';

messageArea.innerHTML = "";

var scoreString = getScoreAsString();

$('#showTour').show();

document.getElementById('score').innerHTML = "";

document.getElementById('outputgroup').innerHTML =

"FINISHED!<br /><font color=red>SCORE : " + scoreString + "</font>";

var percent = eval(scoreString);

if (percent < 0.25)

messageArea.innerHTML = "<center><h3>Game over: You need to study!</h3></center>";

else if (percent < 0.50)

messageArea.innerHTML = "<center><h3>Game over: You need to use Google Earth more.</h3></center>";

else if (percent < 0.50)

messageArea.innerHTML = "<center><h3>Game over: Not bad, but I hope you can do better next time.</h3></center>";

else if (percent < 1.0)

messageArea.innerHTML = "<center><h3>Game over: You are quite good!</h3></center>";

else if (percent >= 1.0)

messageArea.innerHTML = "<center><h3>Game over. Perfect!</h3></center>";

else

messageArea.innerHTML = "<center><h3>Game over.</h3></center>"; // this shouldn't happen

// currentlyUploading = false;

// // jump back to ranking page

// window.location.href = exitURL;

// }

// );

// }

//);

}

//---------------------------------------------------------------------------

</script>

</head>

<body onload='init()' onunload="GUnload()" id='body'>

<div class="title">

<i>Penn State's Amazing Race</i>

</div>

<div>

Navigate your way across the world by moving your aiming box on top of these locations. Remember to zoom in to your location -- having a big box covering a large area does not count.

<div id = "messageArea" class="messagegroup">

<!-- <center><h1>Hello!</h1></center> -->

</div>

</div>

<table>

<tr>

<td>

<div id='map3d'></div>

</td>

<td valign=top>

<input type="button" value="Hide/Show Boundaries" onClick="showHideKml()" /><br />

<input id="showTour" style="display: none;" type="button" value="review Tour" onClick="recordView.indexOfViewRecordArray=0;recordView.showTour();" /><br />

<div id='outputgroup' class="textgroup">

<div id=inRangeTitle" class="subtitle">Mode: <span id="inRangeMode"></span></div>

<div id="inRangeDescription" class="textgroup"></div>

<div id="findtitle" class="subtitle">Now Find</div>

<div id="findProgress" class="textgroup"></div>

<div id="find" class="textgroup"></div>

</div>

<div id="time" style="display:none"></div>

<div id='resultstitle' class="subtitle">Results <span id="score" class="textgroup"></span></div>

<div id='results' class="resultsgroup"></div>

</td>

</tr>

</table>

<embed src="sounds/finalBeep.wav" autostart="false" autobuffer width="0" height="0" id="correctSound" enablejavascript="true">

<!-- <audio id="correctAudio" src="sounds/finalBeep.wav" autobuffer="autobuffer"> -->

<audio id="correctAudio" autobuffer="autobuffer">

<source src="sounds/finalBeep.wav" />

<source src="sounds/finalBeep.mp3" />

</audio>

</body>

</html>

recordView2.js (Downloadable from the URL provided in the section Demonstration).

// code to record user movement

// by TK Lee @ ETS

// 2010-08-16

// This javascript contains the functions to support user movement recording and playback

// viewRecord is a data structure that contains the necessary coordinates at a certain time point

// a viewRecord is sufficient for the Google Earth plugin to return to a specific user view

function viewRecord (lookAt, camera, timestamp)

{

this.lookAt = lookAt;

this.camera = camera;

this.timestamp = timestamp;

}

// the following two functions convert ViewRecord into a JSON representation and vice versa

// This makes it easy to send all user movement records via the network

function unSerializeOneViewRecord (serializedOneViewRecord)

{

var lookAt = ge.getView().copyAsLookAt(ge.ALTITUDE_RELATIVE_TO_GROUND);

var camera = ge.getView().copyAsCamera(ge.ALTITUDE_RELATIVE_TO_GROUND);

var timestamp = serializedOneViewRecord.timestamp;

lookAt.setAltitude(serializedOneViewRecord.lookAt.Altitude);

lookAt.setAltitudeMode(serializedOneViewRecord.lookAt.AltitudeMode);

lookAt.setHeading(serializedOneViewRecord.lookAt.Heading);

lookAt.setLatitude(serializedOneViewRecord.lookAt.Latitude);

lookAt.setLongitude(serializedOneViewRecord.lookAt.Longitude);

lookAt.setRange(serializedOneViewRecord.lookAt.Range);

lookAt.setTilt(serializedOneViewRecord.lookAt.Tilt);

//lookAt.setType(serializedOneViewRecord.lookAt.Type);

camera.setAltitude(serializedOneViewRecord.camera.Altitude);

camera.setAltitudeMode(serializedOneViewRecord.camera.AltitudeMode);

camera.setHeading(serializedOneViewRecord.camera.Heading);

camera.setLatitude(serializedOneViewRecord.camera.Latitude);

camera.setLongitude(serializedOneViewRecord.camera.Longitude);

camera.setRoll(serializedOneViewRecord.camera.Roll);

camera.setTilt(serializedOneViewRecord.camera.Tilt);

//camera.setType(serializedOneViewRecord.camera.Type);

return (new viewRecord (lookAt, camera, timestamp));

}

function serializeOneViewRecord (viewRecord)

{

return {

lookAt: {

Altitude: viewRecord.lookAt.getAltitude(),

AltitudeMode: viewRecord.lookAt.getAltitudeMode(),

Heading: viewRecord.lookAt.getHeading(),

Latitude: viewRecord.lookAt.getLatitude(),

Longitude: viewRecord.lookAt.getLongitude(),

Range: viewRecord.lookAt.getRange(),

Tilt: viewRecord.lookAt.getTilt(),

Type: viewRecord.lookAt.getType()

},

camera: {

Altitude: viewRecord.camera.getAltitude(),

AltitudeMode: viewRecord.camera.getAltitudeMode(),

Heading: viewRecord.camera.getHeading(),

Latitude: viewRecord.camera.getLatitude(),

Longitude: viewRecord.camera.getLongitude(),

Roll: viewRecord.camera.getRoll(),

Tilt: viewRecord.camera.getTilt(),

Type: viewRecord.camera.getType()

},

timestamp: viewRecord.timestamp

};

}

// recordView is the main engine of the record/playback function

// We register all user movement in EventHandler to trigger a recording action (addViewRecord),

// which compares the current Google Earth user view points, locations, etc. (sameViewRecord) to

// the last record, and throws out redundant data.

// showTour is the playback function. See its comments for more details.

var recordView = {

// this is the array to save all movement

viewRecordArray: new Array(),

// the following two functions do data conversion/compression

stringifyViewRecordArray: function() {

var JSONobject = new Array();

for (var x in this.viewRecordArray)

{

JSONobject.push(serializeOneViewRecord(this.viewRecordArray[x]));

}

// we also compress the datastream to save bandwidth

return (

lzw_encode(

JSON.stringify(JSONobject)

)

);

},

unStringifyViewRecordArray: function(string) {

var parsedArray = JSON.parse(lzw_decode(string));

this.viewRecordArray = new Array();

for (var x in parsedArray)

{

this.viewRecordArray.push(

unSerializeOneViewRecord(parsedArray[x])

);

}

},

indexOfViewRecordArray: 0,

// this sets the camera and viewpoint to when viewRecord was recorded

//

setLookAtCamera: function(viewRecord)

{

ge.getView().setAbstractView(viewRecord.lookAt);

ge.getView().setAbstractView(viewRecord.camera);

window.updateReticle(); // Force update because of the reticle lags

},

// this compares two viewRecord. Only relevant ones are compared.

sameViewRecord: function(viewRecord1, viewRecord2)

{

return (

// compare lookAt

viewRecord1.lookAt.getAltitude() == viewRecord2.lookAt.getAltitude()

&& viewRecord1.lookAt.getAltitudeMode() == viewRecord2.lookAt.getAltitudeMode()

&& viewRecord1.lookAt.getHeading() == viewRecord2.lookAt.getHeading()

//&& viewRecord1.lookAt.getId() == viewRecord2.lookAt.getId()

&& viewRecord1.lookAt.getLatitude() == viewRecord2.lookAt.getLatitude()

&& viewRecord1.lookAt.getLongitude() == viewRecord2.lookAt.getLongitude()

//&& viewRecord1.lookAt.getOwnerDocument() == viewRecord2.lookAt.getOwnerDocument()

//&& viewRecord1.lookAt.getParentNode() == viewRecord2.lookAt.getParentNode()

&& viewRecord1.lookAt.getRange() == viewRecord2.lookAt.getRange()

&& viewRecord1.lookAt.getTilt() == viewRecord2.lookAt.getTilt()

&& viewRecord1.lookAt.getType() == viewRecord2.lookAt.getType()

// compare camera

&& viewRecord1.camera.getAltitude() == viewRecord2.camera.getAltitude()

&& viewRecord1.camera.getAltitudeMode() == viewRecord2.camera.getAltitudeMode()

&& viewRecord1.camera.getHeading() == viewRecord2.camera.getHeading()

//&& viewRecord1.camera.getId() == viewRecord2.camera.getId()

&& viewRecord1.camera.getLatitude() == viewRecord2.camera.getLatitude()

&& viewRecord1.camera.getLongitude() == viewRecord2.camera.getLongitude()

//&& viewRecord1.camera.getOwnerDocument() == viewRecord2.camera.getOwnerDocument()

//&& viewRecord1.camera.getParentNode() == viewRecord2.camera.getParentNode()

&& viewRecord1.camera.getRoll() == viewRecord2.camera.getRoll()

&& viewRecord1.camera.getTilt() == viewRecord2.camera.getTilt()

&& viewRecord1.camera.getType() == viewRecord2.camera.getType()

// compare timestamp

// timestamps are likely to be different

//&& viewRecord1.timestamp == viewRecord2.timestamp

);

},

// this is triggered whenever user moves

addViewRecord: function()

{

// record current view status

var thisViewRecord = new viewRecord(

ge.getView().copyAsLookAt(ge.ALTITUDE_RELATIVE_TO_GROUND),

ge.getView().copyAsCamera(ge.ALTITUDE_RELATIVE_TO_GROUND),

this.getCurrentSystemTime()

);

if (this.viewRecordArray.length == 0)

{

this.viewRecordArray.push(thisViewRecord);

return 1;

}

// compares the current view status to the last one. If all the releveant data is the same,

// we throw this redundant data without saving it

var lastViewRecord = this.viewRecordArray[this.viewRecordArray.length-1];

if (this.sameViewRecord(thisViewRecord, lastViewRecord))

{

return 0;

}

this.viewRecordArray.push(thisViewRecord);

return 1;

},

// register our addViewRecord function to eventHandlers

eventHandlers: {

viewchangebegin: function(event) {

setTimeout(

function(event) {

recordView.addViewRecord();

},

100

);

},

viewchangeend: function(event) {

setTimeout(

function(event) {

recordView.addViewRecord();

},

100

);

}

},

getCurrentSystemTime: function(){

var date = new Date();

return(date.getTime());

},

// register our eventHandlers with Google Earth plugin

setEventListeners: function(on)

{

if (on)

{

google.earth.addEventListener(ge.getView(), 'viewchangebegin', this.eventHandlers.viewchangebegin);

google.earth.addEventListener(ge.getView(), 'viewchangeend', this.eventHandlers.viewchangeend);

}

else

{

google.earth.removeEventListener(ge.getView(), 'viewchangebegin', this.eventHandlers.viewchangebegin);

google.earth.removeEventListener(ge.getView(), 'viewchangeend', this.eventHandlers.viewchangeend);

}

},

// this function replays the recorded movement

// it calls itself recursively until the playback of the last movement is completed

// the timestamps in viewRecord is used as the playback time line

showTour: function(){

// if this is the last, do nothing

if (recordView.indexOfViewRecordArray >= recordView.viewRecordArray.length) {return false;}

// otherwise execute the movement

recordView.setLookAtCamera(recordView.viewRecordArray[recordView.indexOfViewRecordArray]);

// then set timer for the next one

var duration = 0;

var thisTimeStamp = recordView.viewRecordArray[recordView.indexOfViewRecordArray].timestamp;

recordView.indexOfViewRecordArray++;

if (recordView.indexOfViewRecordArray >= recordView.viewRecordArray.length)

{

return false;

}

var nextTimeStamp = recordView.viewRecordArray[recordView.indexOfViewRecordArray].timestamp;

duration = nextTimeStamp - thisTimeStamp;

// wait until next saved time stamp to do the next movement

setTimeout(recordView.showTour, duration);

}

};
